# Supplementary material
Source: publisher site journal article supplement (https://www.dovepress.com/article/358239)
Supplement: Supplementary file 1 [file get_supplementary_file.php]

**Supplemental Table 1: Demographic Data of Patients Receiving Intravitreal Injections**

|  | **Post-lockdown**  **N = 361 (14 wk)** | **Lockdown**  **N = 86 (7 wk)** | **Pre-lockdown**  **N = 178 (7 wk)** | **Pre vs Post Odds Ratio (p-value)** | **Lockdown vs Post Odds Ratio (p-value)** |
| --- | --- | --- | --- | --- | --- |
| **Gender** | | | | | |
| Male | 349 (96.7%) | 83 (96.5%) | 173 (97.2%) | 0.90 (0.574) | 0.96 (0.742) |
| Female | 12 (3.3%) | 3 (3.5%) | 5 (2.8%) |
| **Race** | | | | | |
| White | 218 (60.4%) | 44 (51.2%) | 96 (53.9%) | 0.91 (0.243) | 0.97 (0.389) |
| Black | 77 (21.3%) | 18 (20.9%) | 34 (19.1%) | 0.96 (0.661) | 1.02 (0.774) |
| Hispanic or Latino | 38 (10.5%) | 20 (23.3%) | 23 (12.9%) | 1.07 (0.635) | 1.13 (0.027) |
| Asian | 13 (3.6%) | 2 (2.3%) | 5 (2.8%) | 0.87 (0.625) | 0.90 (0.238) |
| Native Hawaiian or Pacific Islander | 10 (2.8%) | 2 (2.3%) | 7 (3.9%) | 1.15 (0.664) | 0.93 (0.111) |
| American Indian or Alaska Native | 9 (2.5%) | 2 (2.3%) | 2 (1.1%) | 0.72 (0.197) | 0.95 (0.74) |
| Other/Unknown | 19 (5.3%) | 2 (2.3%) | 16 (9%) | 1.27 (0.146) | 0.86 (0.016)* |

*****p<0.025. Significance set at 0.025 due to multiple comparisons

**Supplemental Table 2: Medical and Psychiatric Co-morbidities of Patients Receiving Intravitreal Injections**

|  | **Post-lockdown**  **N = 361 (14 wk)** | **Lockdown**  **N = 86 (7 wk)** | **Pre-lockdown**  **N = 178 (7 wk)** | **Pre vs Post Odds Ratio (p-value)** | **Lockdown vs Post Odds Ratio (p-value)** |
| --- | --- | --- | --- | --- | --- |
| **Medical** | | | | | |
| **Body mass index (BMI), kg/m2 | 29.03 ± 0.71 | 29.04 ± 1.28 | 28.41 ± 0.80 | 1.01 (0.382) | 1.0  (0.935) |
| Type 2 Diabetes | 198 (54.9%) | 50 (58.1%) | 101 (56.7%) | 1.02 (0.823) | 1.00 (0.973) |
| Chronic Kidney Disease | 88 (24.4%) | 18 (20.9%) | 44 (24.7%) | 0.99 (0.932) | 0.95  (0.25) |
| Chronic Obstructive Pulmonary Disease | 50 (13.9%) | 11 (12.8%) | 39 (21.9%) | 1.32 (0.008)* | 1.04 (0.555) |
| Cancer | 57 (15.8%) | 9 (10.5%) | 12 (6.7%) | 0.77 (0.007)* | 1.03 (0.649) |
| ***High-risk heart conditions | 156 (43.2%) | 30 (34.9%) | 83 (46.6%) | 1.12 (0.181) | 1.03 (0.556) |
| Sickle Cell | 0 (0%) | 0 (0%) | 1 (0.6%) | 3.71 (<0.0001)* | N/A |
| Hypertension | 293 (81.2%) | 71 (82.6%) | 151 (84.8%) | 1.09 (0.402) | 0.99 (0.805) |
| Organ Transplant | 15 (4.2%) | 0 (0%) | 20 (11.2%) | 1.62 (<0.001)* | 0.78 (<0.0001)* |
| **Psychiatric** | | | | | |
| Depression | 51 (14.1%) | 14 (16.3%) | 36 (20.2%) | 1.21 (0.117) | 1.03 (0.7) |
| Anxiety | 15 (4.2%) | 5 (5.8%) | 13 (7.3%) | 1.39  (0.16) | 1.17 (0.243) |
| Schizophrenia | 6 (1.7%) | 2 (2.33%) | 6 (3.4%) | 1.37 (0.278) | 1.02 (0.902) |
| Schizoaffective | 1 (0.3%) | 0 (0%) | 3 (1.7%) | 2.26 (0.082) | 0.79 (<0.0001)* |
| Post-traumatic stress disorder | 41 (11.4%) | 11 (12.8%) | 18 (10.1%) | 0.96 (0.722) | 1.03 (0.635) |
| Psychosis | 3 (0.8%) | 0 (0%) | 0 (0%) | 1.06 (0.151) | 1.68 (<0.0001)* |
| Other | 60 (16.6%) | 8 (9.3%) | 36 (20.2%) | 1.11 (0.314) | 0.91 (0.117) |
| None | 103 (57.9%) | 227 (62.9%) | 56 (65.1%) | 0.89 (0.174) | 0.98 (0.618) |

* p<0.025. Significance set at 0.025 due to multiple comparisons

** BMI presented as mean ± 95% confidence interval. Comparison of odds ratio for BMI indicates increased (>1.0) or decreased (<1.0) chance of having a higher mean BMI between groups.

*** High-risk heart conditions = heart failure, coronary artery disease, cardiomyopathy, arrhythmia, valvular disease

**Supplemental Table 3: Intravitreal Injection Patients BMI >30**

|  | **Post-lockdown** | **Lockdown** | **Pre-lockdown** |
| --- | --- | --- | --- |
| Number of BMI >30 | 74 | 32 | 55 |
| Total Patients | 194 | 74 | 159 |
| % BMI > 30 | 38.1% | 43.2% | 34.6% |
|  |  |  |  |
| Pearson-Chi square | 1.264 | p-value | 0.532 |

**Supplemental Table 4: Intravitreal Injection Patients BMI >40**

|  | **Post-lockdown** | **Lockdown** | **Pre-lockdown** |
| --- | --- | --- | --- |
| Number of BMI >40 | 10 | 2 | 3 |
| Total Patients | 194 | 74 | 159 |
| % BMI > 40 | 5.2% | 2.7% | 1.9% |
|  |  |  |  |
| Pearson-Chi square | 3.433 | p-value | 0.18 |

**Supplemental Table 5: Indications for Intravitreal Injections**

|  | **Post-lockdown**  **N = 361 (14 wk)** | **Lockdown**  **N = 86 (7 wk)** | **Pre-lockdown**  **N = 178 (7 wk)** | **Pre vs Post Odds Ratio (p-value)** | **Lockdown vs Post Odds Ratio (p-value)** |  |
| --- | --- | --- | --- | --- | --- | --- |
| Age-related macular degeneration | 161 (41.8%) | 40 (46.5%) | 68 (38.2)% | 0.91 (0.263) | 0.98 (0.652) |
| Diabetic retinopathy | 128 (35.5%) | 22 (25.6%) | 61 (34.3%) | 0.95 (0.58) | 0.9 (0.01)* |
| Central serous retinopathy | 8 (2.22%) | 1 (1.2%) | 5 (2.8%) | 1.08 (0.774) | 0.88 (0.135) |
| Retinal vein occlusion | 56 (15.5%) | 13 (15.1%) | 30 (16.9%) | 1.07 (0.514) | 1.04 (0.553) |
| Other macular edema | 6 (1.7%) | 1 (1.2%) | 4 (2.3%) | 1.12 (0.678) | 0.91 (0.426) |
| Other conditions | 14 (3.9%) | 9 (10.5%) | 9 (5.1%) | 1.10 (0.687) | 1.18 (0.127) |

* p<0.025. Significance set at 0.025 due to multiple comparisons.
